# Supplementary material for: Towards promoting plant growth and fruit maturation: a highly efficient and thermally stable Cr3+ doped far-red phosphor
Source: Royal Society of Chemistry journal article supplement (doi:10.1039/d4tc01953a), 2024-01-01
Supplement: d4tc01953a1.pdf [file d4tc01953a1.pdf]

## Supporting Information

### Towards Promoting Plant Growth and Fruit Maturation: Highly Efficient and Thermally Stable Cr<sup>3+</sup> Doped Far-Red Phosphor

Chaowei Yang <sup>a</sup>, Xikun Zou <sup>a</sup>, Mengqi Lyu <sup>a</sup>, Mingkai Wei <sup>a</sup>, Ziyi Wang <sup>a</sup>, Xiaoyu Shuang <sup>a</sup>, Xuejie Zhang <sup>a</sup>, Bin Dong <sup>b</sup>, Xinming Li <sup>b</sup>, Yan Cong <sup>b, \*</sup>, Mingtao Zheng <sup>a, c</sup>, Maxim S. Molokeev <sup>d</sup>, and Bingfu Lei <sup>a, b, \*</sup>

<sup>a</sup> Key Laboratory for Biobased Materials and Energy of Ministry of Education, College of Materials and Energy, South China Agricultural University Guangzhou 510642, Guangdong, P. R. China

<sup>b</sup> College of Physics and Materials Engineering, Dalian Minzu University, Dalian 11660, P. R. China

<sup>c</sup> Maoming Branch, Guangdong Laboratory for Lingnan Modern Agriculture, Guangdong Maoming 525100, P. R. China

<sup>d</sup> Department of Physics and Technical Sciences, Western Caspian University, Baku, AZ 1001, Azerbaijan

\*Corresponding authors E-mail: tleibf@scau.edu.cn

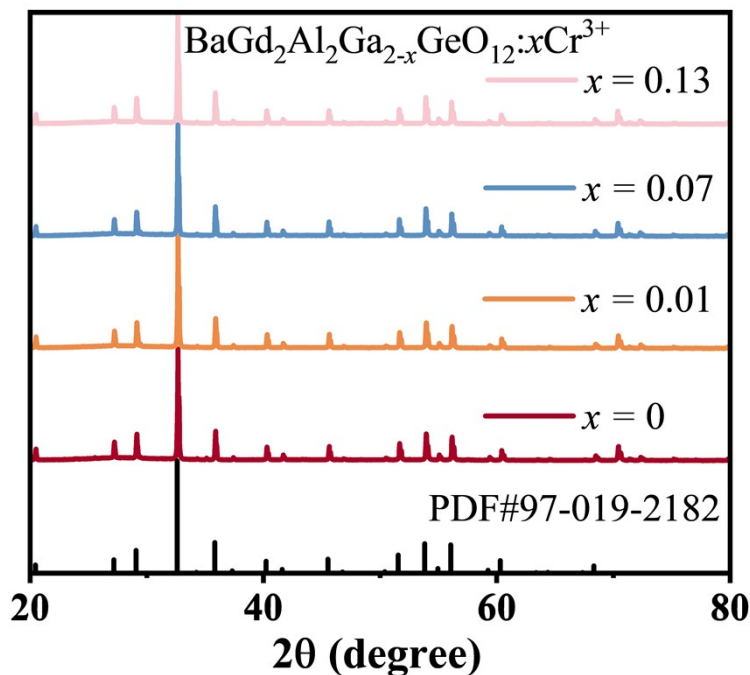

Fig. S1 XRD patterns of the BaGd<sub>2</sub>Al<sub>2</sub>Ga<sub>2-x</sub>GeO<sub>12</sub>:xCr<sup>3+</sup> (x = 0.01, 0.07, 0.13).

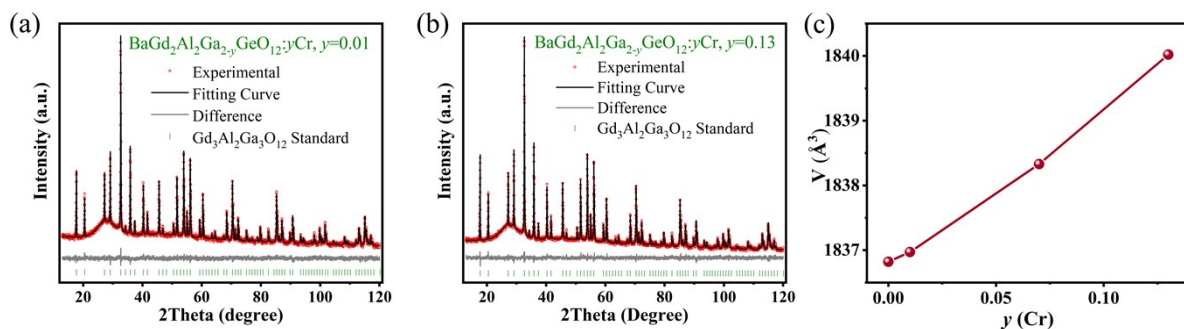

**Fig. S2** Difference Rietveld plot of  $\text{BaGd}_2\text{Al}_2\text{Ga}_{2-x}\text{GeO}_{12}:x\text{Cr}^{3+}$  (a)  $x = 0.01$ , (b)  $x = 0.13$ ; (c) Volume  $V$  with the increase of the  $\text{Cr}^{3+}$  concentration.

**Table S1** Crystallographic data of  $\text{BaGd}_2\text{Al}_2\text{Ga}_{2-x}\text{GeO}_{12}:x\text{Cr}^{3+}$  with different  $x$  values.

| Formula                           | $y = 0$     | $y = 0.01$  | $y = 0.07$  | $y = 0.13$  |
|-----------------------------------|-------------|-------------|-------------|-------------|
| Space Group                       | Ia-3d       |             |             |             |
| Cell parameters $a/b/c$ (Å)       | 12.2468(12) | 12.2471(16) | 12.2502(14) | 12.2539(15) |
| Cell Volume $V$ (Å <sup>3</sup> ) | 1836.82(6)  | 1836.97(7)  | 1838.33(6)  | 1840.02(7)  |
| $2\theta$ -interval, °            | 5-120       |             |             |             |
| $R_{\text{wp}}$ , %               | 6.5         | 7.06        | 6.61        | 6.68        |
| $R_{\text{p}}$ , %                | 5.08        | 5.54        | 5.14        | 5.19        |
| $\chi^2$                          | 2.4         | 2.55        | 2.35        | 1.93        |
| $R_{\text{B}}$ , %                | 1.18        | 1.21        | 1.26        | 1.23        |

**Table S2** Fractional atomic coordinates and isotropic displacement parameters ( $\text{\AA}^2$ ) of  $\text{BaGd}_2\text{Al}_2\text{Ga}_{2-x}\text{GeO}_{12}:x\text{Cr}^{3+}$  ( $0 \leq x \leq 0.13$ ).

| Atom                                                                          | $x$       | $y$       | $z$       | $B_{\text{iso}}$ | $Occ.$    |
|-------------------------------------------------------------------------------|-----------|-----------|-----------|------------------|-----------|
| $\text{BaGd}_2\text{Al}_2\text{Ga}_2\text{GeO}_{12}$                          |           |           |           |                  |           |
| Ba                                                                            | 0.25      | 0.125     | 0         | 1.54(7)          | 0.33333   |
| Gd                                                                            | 0.25      | 0.125     | 0         | 1.54(7)          | 0.66667   |
| Ge1                                                                           | 0         | 0         | 0         | 2.79(11)         | 0.5       |
| Ga1                                                                           | 0         | 0         | 0         | 2.79(11)         | 0.001(10) |
| Al1                                                                           | 0         | 0         | 0         | 2.79(11)         | 0.500(10) |
| Ga2                                                                           | 0.25      | 0.375     | 0         | 1.00(9)          | 0.576(8)  |
| Al2                                                                           | 0.25      | 0.375     | 0         | 1.00(9)          | 0.424(8)  |
| O1                                                                            | 0.0326(4) | 0.0491(4) | 0.6503(4) | 1.21(15)         | 1         |
| $\text{BaGd}_2\text{Al}_2\text{Ga}_{1.99}\text{GeO}_{12}:0.01\text{Cr}^{3+}$  |           |           |           |                  |           |
| Ba                                                                            | 0.25      | 0.125     | 0         | 1.26(7)          | 0.3333333 |
| Gd                                                                            | 0.25      | 0.125     | 0         | 1.26(7)          | 0.6666667 |
| Ge1                                                                           | 0         | 0         | 0         | 2.64(12)         | 0.5       |
| Ga1                                                                           | 0         | 0         | 0         | 2.64(12)         | 0.001(11) |
| Al1                                                                           | 0         | 0         | 0         | 2.64(12)         | 0.500(11) |
| Ga2                                                                           | 0.25      | 0.375     | 0         | 1.00(9)          | 0.595(9)  |
| Al2                                                                           | 0.25      | 0.375     | 0         | 1.00(9)          | 0.405(9)  |
| O                                                                             | 0.0340(5) | 0.0475(5) | 0.6493(4) | 1.26(16)         | 1         |
| $\text{BaGd}_2\text{Al}_2\text{Ga}_{1.93}\text{GeO}_{12}:0.07\text{Cr}^{3+}$  |           |           |           |                  |           |
| Ba                                                                            | 0.25      | 0.125     | 0         | 1.45(7)          | 0.3333333 |
| Gd                                                                            | 0.25      | 0.125     | 0         | 1.45(7)          | 0.6666667 |
| Ge1                                                                           | 0         | 0         | 0         | 2.66(11)         | 0.5       |
| Ga1                                                                           | 0         | 0         | 0         | 2.66(11)         | 0.001(10) |
| Al1                                                                           | 0         | 0         | 0         | 2.66(11)         | 0.500(10) |
| Ga2                                                                           | 0.25      | 0.375     | 0         | 1.00(9)          | 0.560(8)  |
| Al2                                                                           | 0.25      | 0.375     | 0         | 1.00(9)          | 0.440(8)  |
| O                                                                             | 0.0322(4) | 0.0480(5) | 0.6512(4) | 1.14(15)         | 1         |
| $\text{BaGd}_2\text{Al}_2\text{Ga}_{1.87}\text{GeO}_{12}:0.013\text{Cr}^{3+}$ |           |           |           |                  |           |
| Ba                                                                            | 0.25      | 0.125     | 0         | 1.51(7)          | 0.3333333 |
| Gd                                                                            | 0.25      | 0.125     | 0         | 1.51(7)          | 0.6666667 |
| Ge1                                                                           | 0         | 0         | 0         | 2.49(11)         | 0.5       |
| Ga1                                                                           | 0         | 0         | 0         | 2.49(11)         | 0.001(10) |
| Al1                                                                           | 0         | 0         | 0         | 2.49(11)         | 0.500(10) |
| Ga2                                                                           | 0.25      | 0.375     | 0         | 1.00(9)          | 0.561(8)  |

| Atom | <i>x</i>  | <i>y</i>  | <i>z</i>  | <i>B</i> <sub>iso</sub> | <i>Occ.</i> |
|------|-----------|-----------|-----------|-------------------------|-------------|
| Al2  | 0.25      | 0.375     | 0         | 1.00(9)                 | 0.439(8)    |
| O    | 0.0332(5) | 0.0491(5) | 0.6506(4) | 1.44(15)                | 1           |

**Table S3** Main bond lengths (Å) of BaGd<sub>2</sub>Al<sub>2</sub>Ga<sub>2-x</sub>GeO<sub>12</sub>:xCr<sup>3+</sup>.

| BaGd <sub>2</sub> Al <sub>2</sub> Ga <sub>2-x</sub> GeO <sub>12</sub> :xCr <sup>3+</sup> |            |                      |            |
|------------------------------------------------------------------------------------------|------------|----------------------|------------|
| $x = 0$                                                                                  |            |                      |            |
| Ba—O <sup>i</sup>                                                                        | 2.5117(48) | Ba—O <sup>ii</sup>   | 2.3617(48) |
| Y—O <sup>i</sup>                                                                         | 2.5117(48) | Y—O <sup>ii</sup>    | 2.3617(48) |
| Ge1—O <sup>iii</sup>                                                                     | 1.9771(48) | Ga1—O <sup>iii</sup> | 1.9771(48) |
| Al1—O <sup>iii</sup>                                                                     | 1.9771(48) | Ga2—O <sup>iv</sup>  | 1.7700(48) |
| Ga2—O <sup>v</sup>                                                                       | 3.3676(48) | Al2—O <sup>iv</sup>  | 1.7700(48) |
| $x = 0.01$                                                                               |            |                      |            |
| Ba—O <sup>i</sup>                                                                        | 2.5323(49) | Ba—O <sup>ii</sup>   | 2.3772(60) |
| Y—O <sup>i</sup>                                                                         | 2.5323(49) | Y—O <sup>ii</sup>    | 2.3772(60) |
| Ge1—O <sup>iii</sup>                                                                     | 1.9634(50) | Ga1—O <sup>iii</sup> | 1.9634(50) |
| Al1—O <sup>iii</sup>                                                                     | 1.9634(50) | Ga2—O <sup>iv</sup>  | 1.7611(60) |
| Ga2—O <sup>v</sup>                                                                       | 3.3529(53) | Al2—O <sup>iv</sup>  | 1.7611(60) |
| $x = 0.07$                                                                               |            |                      |            |
| Ba—O <sup>i</sup>                                                                        | 2.5262(49) | Ba—O <sup>ii</sup>   | 2.3492(57) |
| Y—O <sup>i</sup>                                                                         | 2.5262(49) | Y—O <sup>ii</sup>    | 2.3492(57) |
| Ge1—O <sup>iii</sup>                                                                     | 1.9829(50) | Ga1—O <sup>iii</sup> | 1.9829(50) |
| Al1—O <sup>iii</sup>                                                                     | 1.9829(50) | Ga2—O <sup>iv</sup>  | 1.7615(54) |
| Ga2—O <sup>v</sup>                                                                       | 3.3821(50) | Al2—O <sup>iv</sup>  | 1.7615(54) |
| $x = 0.13$                                                                               |            |                      |            |
| Ba—O <sup>i</sup>                                                                        | 2.5148(49) | Ba—O <sup>ii</sup>   | 2.3672(60) |
| Y—O <sup>i</sup>                                                                         | 2.5148(49) | Y—O <sup>ii</sup>    | 2.3672(60) |
| Ge1—O <sup>iii</sup>                                                                     | 1.9832(50) | Ga1—O <sup>iii</sup> | 1.9832(50) |
| Al1—O <sup>iii</sup>                                                                     | 1.9832(50) | Ga2—O <sup>iv</sup>  | 1.7638(59) |
| Ga2—O <sup>v</sup>                                                                       | 3.3657(53) | Al2—O <sup>iv</sup>  | 1.7638(59) |

Symmetry codes: Symmetry codes: (i) -x+1/4, -z-3/4, y+1/4; (ii) -z+1, -x, -y; (iii) -x, y, z+1/2; (iv) z+1/2, -x+1/2, -y; (v) z+1/4, y+1/4, -x+1/4

**Table S4** Detailed measured data of the FR pc-LED output power and efficiency under different current drive.

| Current<br>(mA) | Voltage<br>(V) | Input electrical<br>power (mW) | FR output power<br>(mW) | photoelectric<br>efficiency |
|-----------------|----------------|--------------------------------|-------------------------|-----------------------------|
| 50              | 2.76           | 138                            | 19.46                   | 14.10%                      |
| 100             | 2.87           | 287                            | 36.78                   | 12.82%                      |
| 150             | 2.96           | 444                            | 51.61                   | 11.62%                      |
| 200             | 3.04           | 608                            | 66.25                   | 10.90%                      |
| 250             | 3.10           | 775                            | 77.33                   | 9.98%                       |
| 300             | 3.15           | 945                            | 89.96                   | 9.52%                       |
| 350             | 3.19           | 1117                           | 98.67                   | 8.84%                       |
| 400             | 3.26           | 1304                           | 107.36                  | 8.23%                       |
